# Supplementary material for: Pharmacokinetics, Safety, and Tolerability of Tenapanor in Healthy Chinese and Caucasian Volunteers: A Randomized, Open-Label, Single-Center, Placebo-Controlled Phase 1 Study
Source: Hindawi journal article supplement (doi:10.1155/2024/1386980), 2024-03-06
Supplement: f1 [file 1386980.f1.pdf]

**Supplementary Figure 1** Dose and exposure relationship over the single-ascending dose range of 10 to 50 mg in healthy Chinese subjects. Filled circles and lines in orange indicate the theoretical exposure according to a proportional increase along with the dose levels, and those in blue indicate the actual exposure after single-ascending doses.

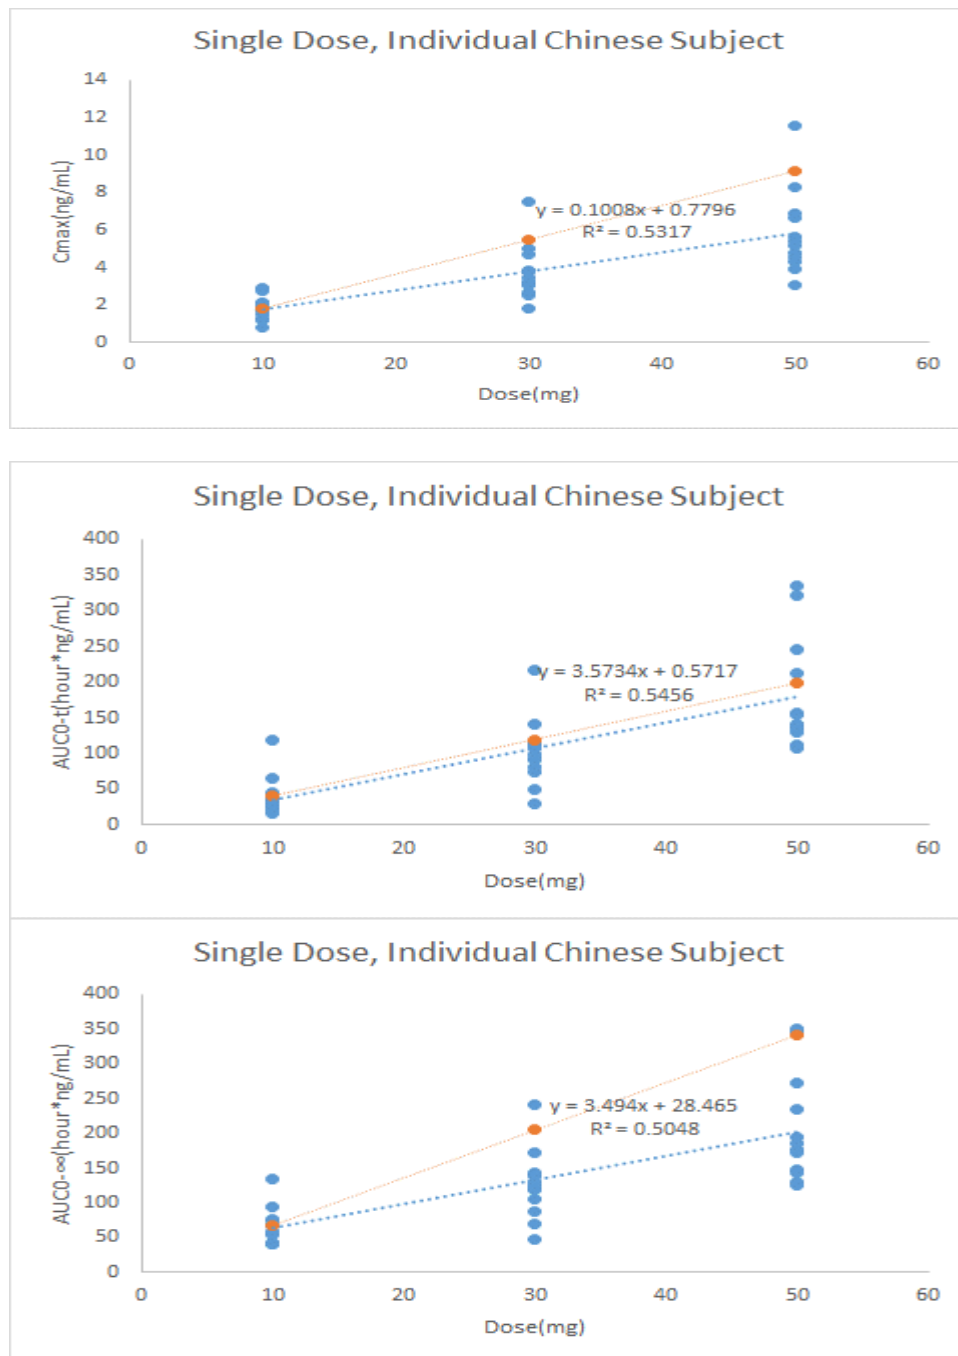

**Supplementary Figure 2** Dose and exposure relationship over the single- and multiple-ascending dose range of 15 to 180 (90) mg in Japanese healthy subjects from study D5611C00005 (NCT02176252). Filled circles and lines in orange indicate the theoretical exposure according to a proportional increase along with the dose levels, and those in blue indicate the actual exposure under single-ascending doses.

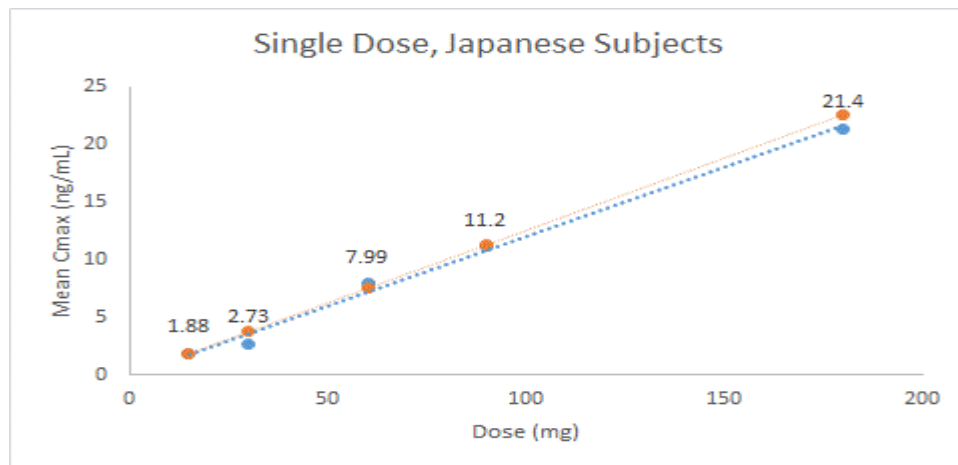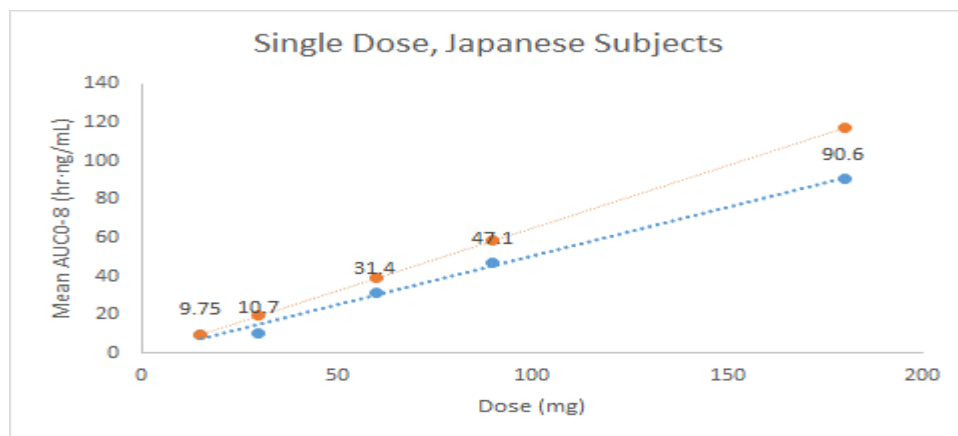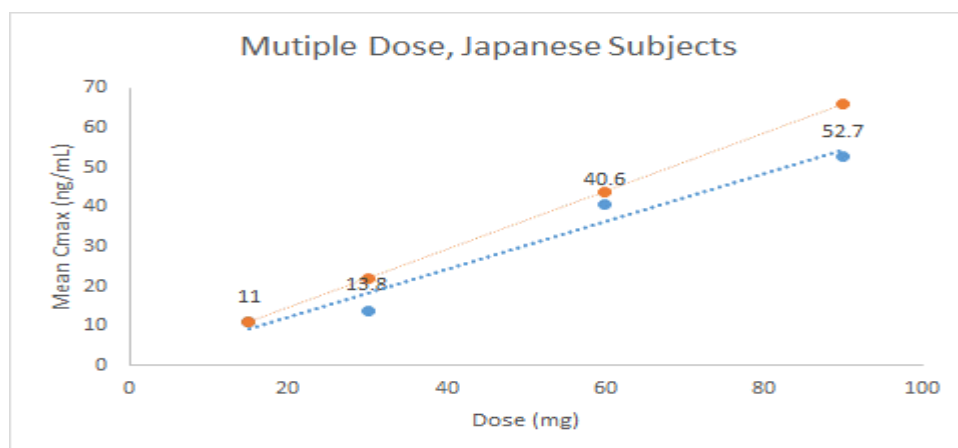

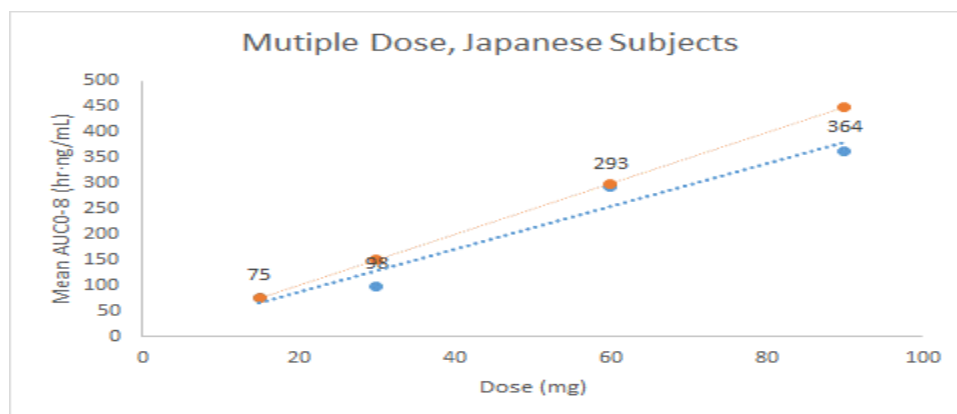

**Supplementary Table 1** Comparison of PK parameters of tenapanor-M1 in healthy Chinese and Caucasian subjects receiving 50 mg single and repeated dose of tenapanor.

|                               | Geometric mean and ratios |               |                   | 90% CI<br>of Chinese/Caucasian |
|-------------------------------|---------------------------|---------------|-------------------|--------------------------------|
|                               | Chinese                   | Caucasian     | Chinese/Caucasian |                                |
| <b>50 mg-Single dose</b>      |                           |               |                   |                                |
| $C_{max}$ (ng/mL)             | 5.52 (n=12)               | 5.25 (n=11)   | 1.05              | 0.78-1.41                      |
| $AUC_{0-t}$ (hour*ng/mL)      | 169.70 (n=12)             | 129.42 (n=11) | 1.31              | 0.92-1.87                      |
| $AUC_{0-\infty}$ (hour*ng/mL) | 195.09 (n=12)             | 172.30 (n=9)  | 1.13              | 0.84-1.53                      |
| <b>50 mg-Repeated dose</b>    |                           |               |                   |                                |
| $C_{ss}$ (ng/mL)              | 13.46 (n=12)              | 12.16 (n=11)  | 1.11              | 0.87-1.41                      |
| $C_{max_{ss}}$ (ng/mL)        | 19.18 (n=12)              | 17.60 (n=11)  | 1.09              | 0.88-1.34                      |
| $C_{min_{ss}}$ (ng/mL)        | 13.34 (n=12)              | 12.16 (n=11)  | 1.10              | 0.86-1.39                      |
| $C_{av_{ss}}$ (ng/mL)         | 16.81 (n=12)              | 15.21 (n=11)  | 1.10              | 0.89-1.37                      |
| $AUC_{0-\tau}$ (hour*ng/mL)   | 201.71 (n=12)             | 182.57 (n=11) | 1.10              | 0.89-1.37                      |

*AUC* area under curve, *CI* confidence interval
